# Supplementary material for: Self limiting atomic layer deposition of Al2O3 on perovskite surfaces: a reality?
Source: Royal Society of Chemistry journal article supplement (doi:10.1039/c5nr06974b), 2016-01-01
Supplement: c5nr06974b1.pdf [file c5nr06974b1.pdf]

## Supporting Information

### **Self Limiting Atomic Layer Deposition of Al<sub>2</sub>O<sub>3</sub> on Perovskite surfaces: A Reality?**

Devika Choudhury,<sup>a</sup> Gopalan Rajaraman<sup>b</sup>, Shaibal K. Sarkar<sup>a\*</sup>

<sup>a</sup>Department of Energy Science and Engineering, Indian Institute of Technology Bombay, Mumbai-400076, India.

<sup>b</sup>Department of Chemistry, Indian Institute of Technology Bombay, Mumbai-400076, India.

\* Email id: [shaibal.sarkar@iitb.ac.in](mailto:shaibal.sarkar@iitb.ac.in)

Tel: +9122 2576 7846;

Fax: +9122 2576 4890

**FIGURES:**

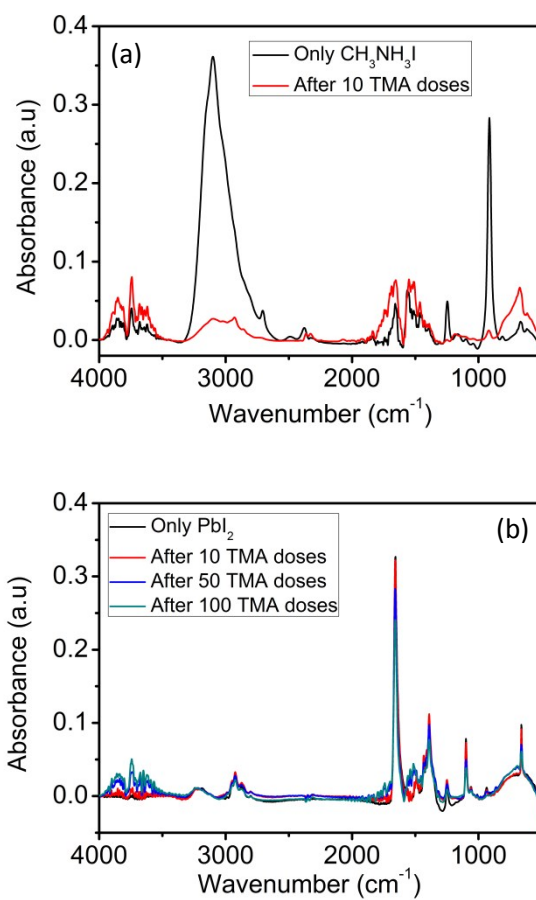

**Figure S1:** FTIR spectra comparison of (a) only methylammoniumiodide (MAI) and after exposure to 10 TMA doses, (b) pure PbI<sub>2</sub> film and after continuous exposure to TMA.

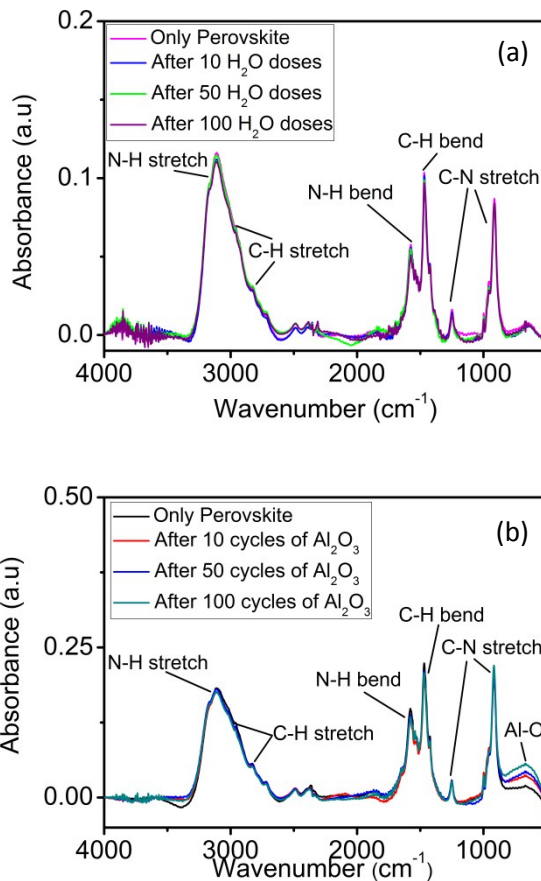

**Figure S2** : FTIR spectra of perovskite deposited on KBr pellet and exposed to (a) repeated H<sub>2</sub>O exposure, (b) sequential (1,1) exposure of TMA-H<sub>2</sub>O.

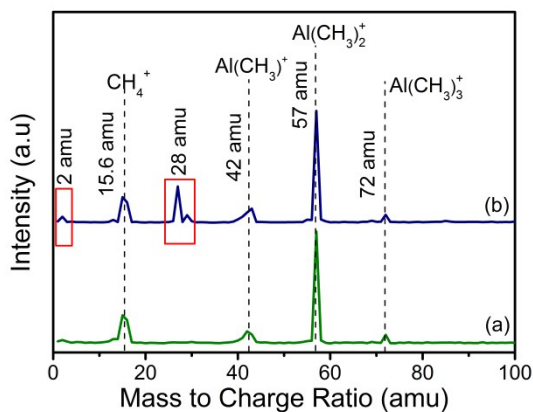

**Figure S3**: Comparison of mass spectrum of the byproducts released after reaction of TMA on (a) hydroxylated Si surface, (b) CH<sub>3</sub>NH<sub>3</sub>PbI<sub>x</sub>Cl<sub>3-x</sub> film surface

As seen from Figure S3b, byproducts corresponding to mass to charge ratio of 2, 16, 28, 42, 57 and 72 amu are recorded during the TMA exposure on perovskite surface. Of them, 16,

42, 57 and 72 amu are the byproducts formed during the base line measurement of TMA exposure on  $-OH$  terminated surface during deposition of  $Al_2O_3$  (shown in fig. S3a). These correspond to the byproduct  $CH_4^+$  and unreacted  $Al(CH)^+$ ,  $Al(CH_3)_2^+$  and  $Al(CH_3)_3^+$  respectively and are in agreement with earlier reports.<sup>1, 2</sup> The additional mass recorded at 2 and 28 amu as seen from fig. 3a can be attributed to  $H_2^+$  and  $N_2^+/CH_3N^+$  ions which can be obtained from the breakdown of the  $CH_3NH_2$  byproduct. Thus the elimination of  $CH_4$  and  $CH_3NH_2$  from the perovskite surface definitely throws light on the probable reaction between TMA and the perovskite structure resulting in the formation of only  $PbI_2$ .

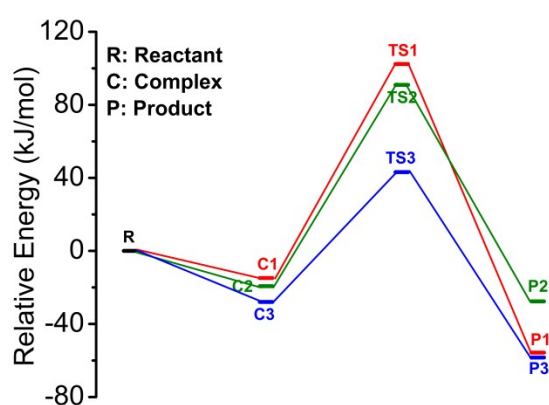

**Figure S4:** Reaction pathways and calculated energies for reactions between  $CH_3NH_3PbI_3$  and (1), (2) TMA dimer, and (3) TMA monomer using UB3LYP functional, basis sets LanL2 for Pb and I, and 6-311++G(d,p) for all the other atoms.

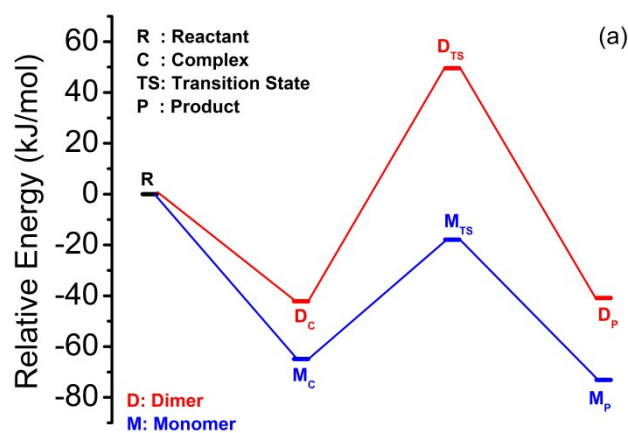

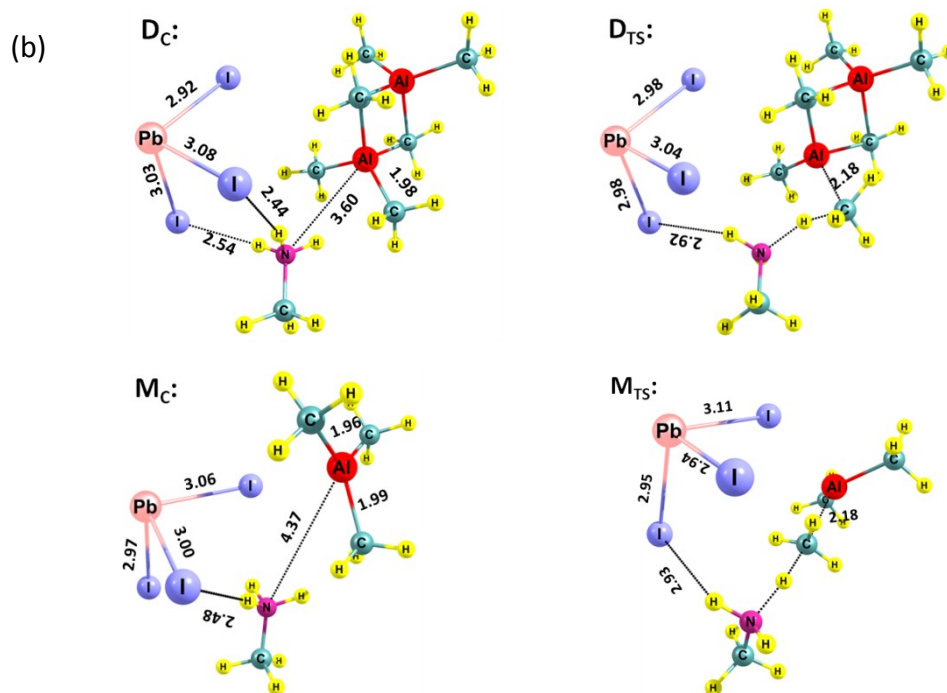

**Figure S5:** (a) Another reaction pathway and calculated energies for reactions between  $\text{CH}_3\text{NH}_3\text{PbI}_3$  TMA dimer (D) and TMA monomer (M) using M06 functional, basis sets LanL2 for Pb and I, and 6-311++G(d,p) for all the other atoms, (b) optimised complex and transition state structures. The reactants and products were kept the same as in the main paper.

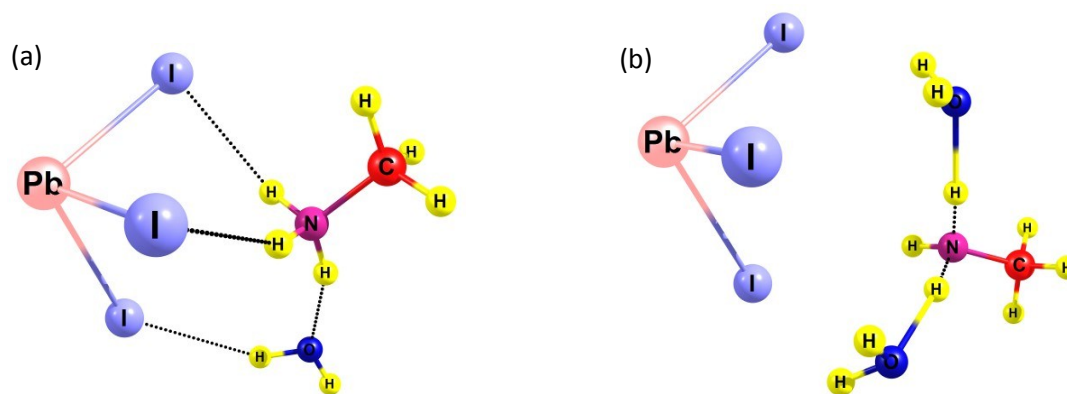

**Figure S6:** Optimized structures obtained by DFT calculations for (a) one and (b) two  $\text{H}_2\text{O}$  molecule interacting with perovskite.

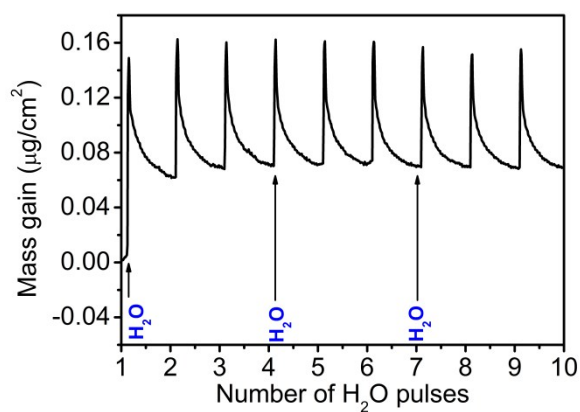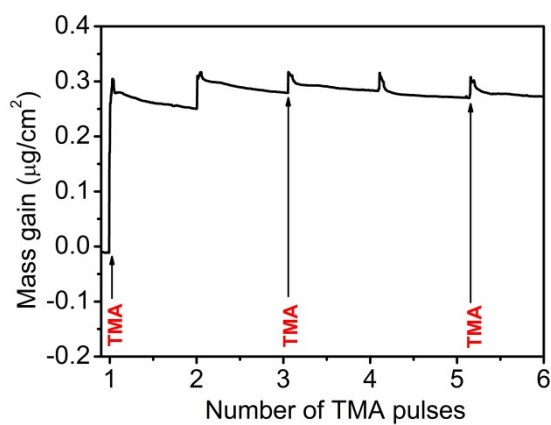

**Figure S7:** (a) Self-saturation H<sub>2</sub>O studied on perovskite surface as observed by *in-situ* QCM, (b) Mass change observed after subsequent TMA exposure.

**References:**

- 1 R. E. Winters and R. W. Kiser, *J. Organomet. Chem*, 1967, **10**, 7-14.
- 2 J. Tanaka and S. R. Smith, *Inorg. Chem*, 1969, **8**, 265-270.
